# Supplementary material for: Salvianolic acid B attenuates the inflammatory response in atherosclerosis by regulating MAPKs/ NF-κB signaling pathways in LDLR-/- mice and RAW264.7 cells
Source: PubMed Central journal article supplement — Int J Immunopathol Pharmacol. 2022 Mar 12;36:03946320221079468. doi: 10.1177/03946320221079468 (PMC9118216; doi:10.1177/03946320221079468), 2022-03-12
Supplement: sj-pdf-1-iji-10.1177_03946320221079468.pdf [file sj-pdf-1-iji-10.1177_03946320221079468.pdf]

# Supplementary Material

## 1 Animal welfare review material

上海中医药大学附属龙华医院实验动物管理和使用（动物福利）委员会  
Longhua Hospital affiliated to Shanghai University of Traditional Chinese

Laboratory Animal Management and Use (Animal Welfare) Committee      上海中医药大学附属龙华医院实验动物管理和使用（动物福利）委员会 (IACUC)      Longhua Hospital affiliated to Shanghai University of Traditional Chinese Medicine (IACUC)

### 实验动物福利审查意见 Laboratory Animal Welfare Review Opinion

|                |                              |                                                                                                                                                                                                             |      |                                                |
|----------------|------------------------------|-------------------------------------------------------------------------------------------------------------------------------------------------------------------------------------------------------------|------|------------------------------------------------|
| DATE           | 审查日期                         | 2019年4月18日      18th, April, 2019                                                                                                                                                                           |      |                                                |
| PLACE          | 审查地点                         | 龙华医院一号楼九楼会议接待室      Meeting room in Longhua Hospital                                                                                                                                                        |      |                                                |
| PROJECT NUMBER | 项目编号                         | 81873117                                                                                                                                                                                                    | 协议编号 | 2019-N002                                      |
| PROJECT NAME   | 项目名称                         | 基于 SENP1 介导巨噬细胞胞葬作用探讨冠心康抗动脉粥样硬化的作用机制<br>Based on SENP1 mediated macrophage interment to explore the anti-atherosclerosis mechanism of Guanxinkang                                                           |      |                                                |
| PROJECT LEADER | 项目负责人                        | 刘萍<br>Ping Liu                                                                                                                                                                                              | 实验人员 | 王怡茹 张一凡 丁洁<br>Yiru Wang, Yifan Zhang, Jie Ding |
| REVIEW TYPE    | 审查类别                         | 初次审查<br>Initial review                                                                                                                                                                                      | 审查结果 | 修正后同意<br>agree after correction                |
| REVIEW OPINION | 审查文件<br>REVIEW DOCUMENTS     | 1.项目概述      Project summary<br>2.项目负责人及实验人员简介      Project leader and experiment members<br>3.项目详述      Project details<br>4.遵守实验动物福利伦理原则的声明      Statement of obeying rules of experiment animals' welfare |      |                                                |
| NOTE           | 审查意见                         | 补充 3R 主要措施的详细说明      Replenish the detailed instructions of 3R.                                                                                                                                             |      |                                                |
|                | 备注                           | 递交补充材料      Delivery supplement material                                                                                                                                                                    |      |                                                |
|                | 项目审查部门<br>REVIEW DEPARTMENT  | 上海中医药大学附属龙华医院      Longhua Hospital affiliated to Shanghai University of Traditional Chinese Medicine<br>实验动物管理和使用（动物福利）委员会                                                                                 |      |                                                |
|                | IACUC 审查委员<br>REVIEW MEMBERS | Laboratory Animal Management and Use (Animal Welfare) Committee<br>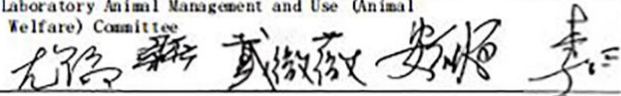                                                     |      |                                                |
|                | 主任委员签字                       |  19年4月26日                                                                                                                |      |                                                |

CHIEF MEMBER SIGNATURE
